# Supplementary material for: Graphene-like BN/gelatin nanobiocomposites for gas barrier applications
Source: Royal Society of Chemistry journal article supplement (doi:10.1039/c4nr05268d), 2014-11-10
Supplement: c4nr05268d1.pdf [file c4nr05268d1.pdf]

# Graphene-like BN/Gelatin nanobiocomposites for gas barrier applications

Jennifer Biscarat<sup>1</sup> Mikhael Bechelany,<sup>1\*</sup> Celine Pochat-Bohatier<sup>1</sup> and Philippe Miele<sup>1</sup>

<sup>1</sup> Institut Européen des Membranes, UMR 5635 CNRS Université Montpellier 2, Place Eugène Bataillon, F-34095 Montpellier cedex 5, France

\* Corresponding author: mikhael.bechelany@univ-montp2.fr, Phone: +33467149167, Fax: +33467149119

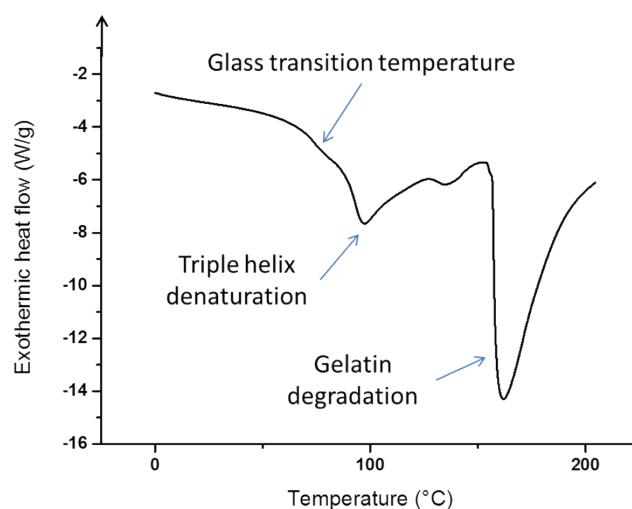

**Figure S1.** Typical thermogram of gelatin/water system for a temperature range from -25 to 210°C: determination of glass transition temperature and denaturation heat flow.

**Table S1.** Extensional rheology protocol

| Duration of each step | Variable      | Profile setting | Variation range |
|-----------------------|---------------|-----------------|-----------------|
| 0.05s                 | Torque (mN m) | Linear ramp     | 0-1             |

|                                         |                      |                  |                      |
|-----------------------------------------|----------------------|------------------|----------------------|
| 0.3s                                    | Deflection angle (°) | Linear ramp      | 0-10                 |
| No time limit ; stopped after 34 points | Elongation (%)       | Logarithmic ramp | 0.001-300            |
|                                         |                      |                  | Frequency fixed: 1Hz |

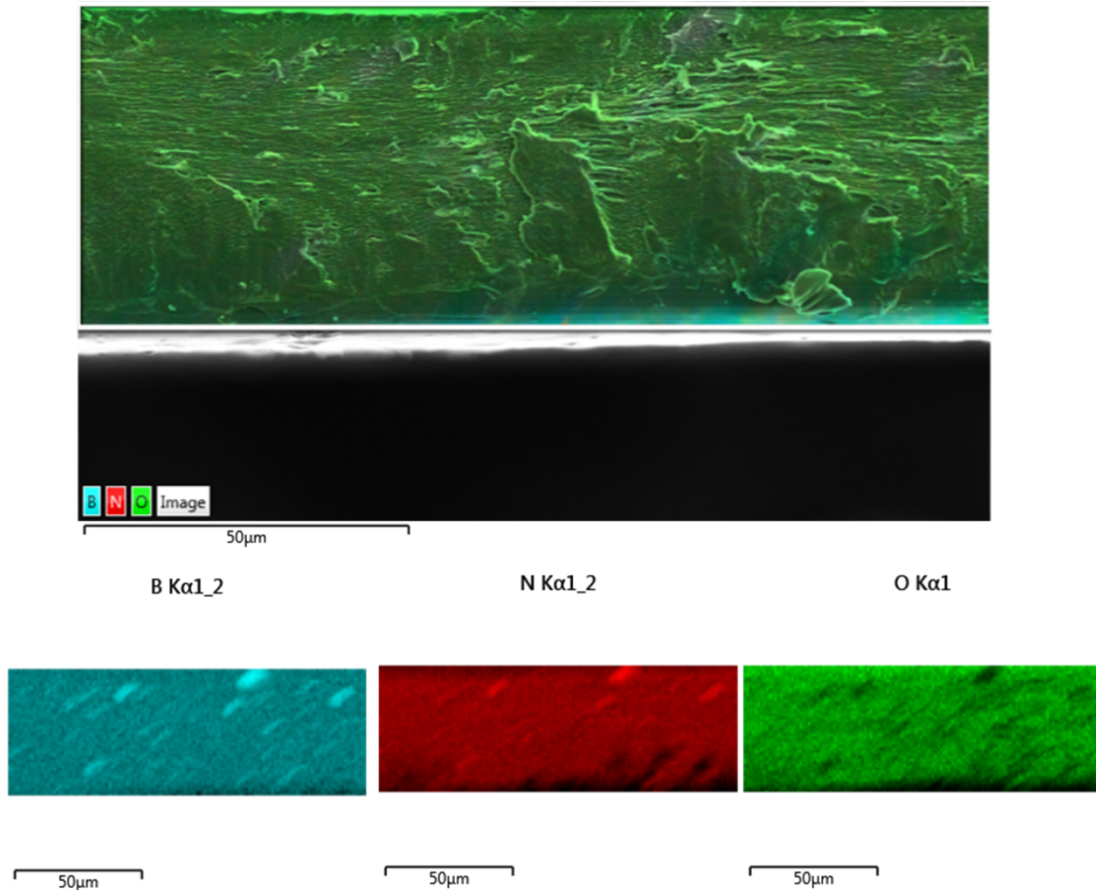

**Figure S2.** EDX cross section element mapping of GE-BN nanobiocomposites of the area highlighted with white square: (i) Boron element mapping (blue), (ii) nitrogen element mapping (red) and (iii) oxygen element mapping (green)

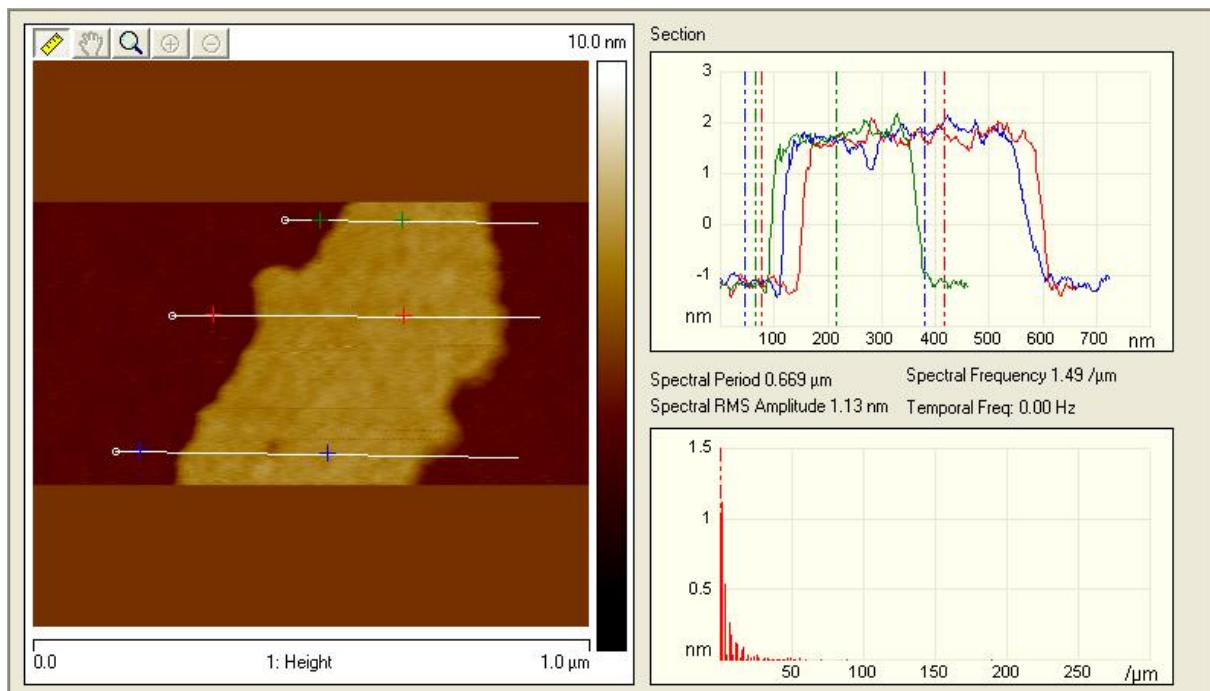

**Figure S3.** AFM image and height profile of a single layer Graphene-like BN
